# Supplementary material for: Magnetothermal heating facilitates the cryogenic recovery of stem cell–laden alginate–Fe3O4nanocomposite hydrogels
Source: Royal Society of Chemistry journal article supplement (doi:10.1039/c8bm01004h), 2018-01-01
Supplement: c8bm01004h12.pdf [file c8bm01004h12.pdf]

## Supporting Information

### **Magnetothermal Heating Facilitates Cryogenic Recovery of Stem Cell-Laden Alginate-Fe<sub>3</sub>O<sub>4</sub> Nanocomposite Hydrogels**

*Xiaozhang Zhang, Gang Zhao\*, Yuan Cao, Zeeshan Haider, Meng Wang, Jianping Fu\**

#### **Movie Captions**

**Movie S1.** Recovery of CPA #1 solution in plastic straw by conventional water bath at 37 °C

**Movie S2.** Recovery of cell-laden alginate–Fe<sub>3</sub>O<sub>4</sub> nanocomposite hydrogels in CPA #2 solution without MTH

**Movie S3.** Recovery of cell-laden alginate–Fe<sub>3</sub>O<sub>4</sub> nanocomposite hydrogels in CPA #2 solution with MTH

**Movie S4.** Cryomicroscopy study of CPA #1 solution during cooling and warming

**Movie S5.** Cryomicroscopy study of CPA #1 solution with 0.1% (w/v) Fe<sub>3</sub>O<sub>4</sub> NPs during cooling and warming

**Movie S6.** Cryomicroscopy study of CPA #1 solution with 0.5% (w/v) Fe<sub>3</sub>O<sub>4</sub> NPs during cooling and warming

**Movie S7.** Cryomicroscopy study of alginate hydrogel during cooling and warming

**Movie S8.** Cryomicroscopy study of alginate hydrogel with 0.1% (w/v) Fe<sub>3</sub>O<sub>4</sub> NPs during cooling and warming

**Movie S9.** Cryomicroscopy study of alginate hydrogel with 0.5% (w/v) Fe<sub>3</sub>O<sub>4</sub> NPs during cooling and warming

**Movie S10.** Cryomicroscopy study of combination of CPA #1 solution, alginate hydrogel and 0.1% (w/v) Fe<sub>3</sub>O<sub>4</sub> NPs during cooling and warming

**Movie S11.** Cryomicroscopy study of combination of CPA #1 solution, alginate hydrogel and 0.5% (w/v) Fe<sub>3</sub>O<sub>4</sub> NPs during cooling and warming

## Supplementary Tables

**Table S1.** Cytotoxicity of alginate-Fe<sub>3</sub>O<sub>4</sub> nanocomposite hydrogels with different concentrations at 0.05, 0.1 and 0.5% (w/v) for 0.5, 1 and 2 h at 4 °C.

| Group     | Viability (%) (Mean ± SD, n) |              |              |
|-----------|------------------------------|--------------|--------------|
|           | 0.5 h                        | 1 h          | 2 h          |
| Fresh     | 96.5±1.8 (3)                 | 95.9±1.3 (3) | 94.8±2.3 (3) |
| 0.05% NCs | 95.9±2.4 (3)                 | 95.0±1.3 (3) | 93.9±1.2 (3) |
| 0.1% NCs  | 95.1±1.8 (3)                 | 94.6±2.2 (3) | 93.7±1.9 (3) |
| 0.5% NCs  | 94.8±1.7 (3)                 | 92.2±3.7 (3) | 91.2±2.3 (3) |

**Table S2.** Cell viability of unencapsulated and encapsulated MSCs without or with MTH.

| Group           | Viability (%) (Mean ± SD, n) |              |
|-----------------|------------------------------|--------------|
|                 | W/O Encap                    | W/ Encap     |
| Fresh (Control) | 98.8±0.6 (4)                 |              |
| W/O MTH         | 16.9±4.5 (4)                 | 72.1±3.8 (4) |
| W/ MTH, 15 A    | 35.8±3.0 (4)                 | 82.8±5.2 (4) |

**Table S3.** Cell viability of encapsulated MSCs with MTH by nanocomposite hydrogels under different current intensities.

| Group | Viability (%) (Mean ± SD, n) |              |              |
|-------|------------------------------|--------------|--------------|
|       | 0.05% NCs                    | 0.1% NCs     | 0.5% NCs     |
| 5 A   | 70.1±3.1 (4)                 | 73.6±3.0 (4) | 72.7±4.2 (4) |
| 15 A  | 73.0±3.6 (4)                 | 75.9±5.0 (4) | 82.8±5.2 (4) |
| 20 A  | 72.7±4.2 (4)                 | 75.8±3.7 (4) | 78.3±4.5 (4) |

**Table S4.** Cell viability of MSCs encapsulated in 0.05% nanocomposite hydrogels with MTH by nanoparticles in CPA solution under different current intensities.

| <b>Group</b>           | <b>Viability (%) (Mean <math>\pm</math> SD, n)</b> |                    |                    |
|------------------------|----------------------------------------------------|--------------------|--------------------|
|                        | <b>0.05% NPs</b>                                   | <b>0.1% NPs</b>    | <b>0.5% NPs</b>    |
| <b>Fresh (Control)</b> |                                                    | 98.7 $\pm$ 0.8 (4) |                    |
| <b>W/O MTH</b>         |                                                    | 98.7 $\pm$ 0.8 (4) |                    |
| <b>5 A</b>             | 71.0 $\pm$ 4.6 (4)                                 | 72.1 $\pm$ 4.9 (4) | 71.9 $\pm$ 2.4 (4) |
| <b>15 A</b>            | 73.4 $\pm$ 4.0 (4)                                 | 77.2 $\pm$ 5.1 (4) | 84.6 $\pm$ 3.7 (4) |
| <b>20 A</b>            | 72.6 $\pm$ 3.8 (4)                                 | 74.3 $\pm$ 5.4 (4) | 76.1 $\pm$ 4.1 (4) |

**Table S5.** Viability of MSCs without or with MTH after proliferation for 24, 48 and 72 h.

| <b>Group</b>   | <b>Viability (Mean <math>\pm</math> SD, n)</b> |                     |                     |
|----------------|------------------------------------------------|---------------------|---------------------|
|                | <b>24 h</b>                                    | <b>48 h</b>         | <b>72 h</b>         |
| <b>Fresh</b>   | 1 $\pm$ 0.03 (4)                               | 1.61 $\pm$ 0.03 (4) | 3.05 $\pm$ 0.06 (4) |
| <b>W/O MTH</b> | 1 $\pm$ 0.03 (4)                               | 1.60 $\pm$ 0.01 (4) | 2.99 $\pm$ 0.14 (4) |
| <b>W/ MTH</b>  | 1 $\pm$ 0.06 (4)                               | 1.61 $\pm$ 0.02 (4) | 3.01 $\pm$ 0.11 (4) |
